# Supplementary material for: Depth-profiling of Yb3+ sensitizer ions in NaYF4 upconversion nanoparticles
Source: Royal Society of Chemistry journal article supplement (doi:10.1039/c7nr01456b), 2017-01-01
Supplement: c7nr01456b1.pdf [file c7nr01456b1.pdf]

Supplementary Information

# Depth-profiling of Yb<sup>3+</sup> sensitizer ions in NaYF<sub>4</sub> upconversion nanoparticles

*Xiaoxue Xu<sup>‡, £, \*</sup>, Christian Clarke<sup>£</sup>, Chenshuo Ma<sup>§, ‡</sup>, Gilberto Casillas<sup>□</sup>, Minakshi Das<sup>‡</sup>,  
Ming Guan<sup>£</sup>, Deming Liu<sup>£</sup>, Li Wang<sup>□</sup>, Anton Tadich<sup>∞</sup>, Yi Du<sup>□</sup>, Cuong Ton-That<sup>£, \*,</sup> and  
Dayong Jin<sup>£, †</sup>*

<sup>‡</sup> Department of Chemistry and Biomolecular Science, Macquarie University, Sydney, NSW, 2109, Australia;

<sup>£</sup> Institute for Biomedical Materials and Devices, Faculty of Science, University of Technology Sydney, NSW, 2007, Australia;

<sup>□</sup> Institute for Superconducting and Electronic Materials, Innovation Campus, University of Wollongong, NSW, 2522, Australia

<sup>§</sup> Department of Engineering, Macquarie University, Sydney, NSW, 2109, Australia;

<sup>†</sup> ARC Research Hub for Integrated Device for End-user Analysis at Low-levels (IDEAL), Faculty of Science, University of Technology Sydney, NSW, 2007, Australia;

<sup>∞</sup> Australian Synchrotron, 800 Blackburn Road, Clayton, Victoria 3168, Australia

## Corresponding Authors

[Xiaoxue.xu@mq.edu.au](mailto:Xiaoxue.xu@mq.edu.au)

[Cuong.Ton-That@uts.edu.au](mailto:Cuong.Ton-That@uts.edu.au)

## SUPPORTING RESULTS:

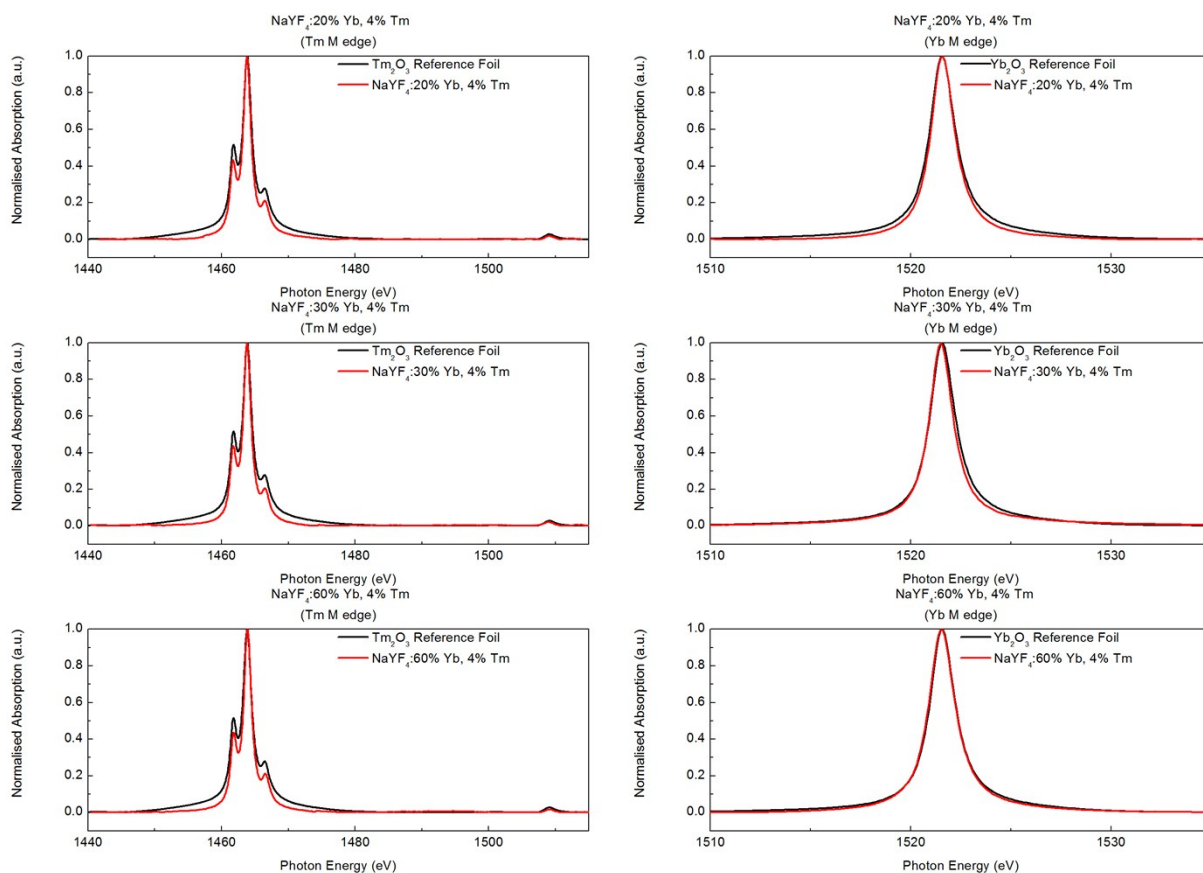

**Figure S1.** Normalised M-edge NEXAFS spectra of three UCNPs samples plotted together with respective Tm<sub>2</sub>O<sub>3</sub> and Yb<sub>2</sub>O<sub>3</sub> reference foils, confirming both Yb and Tm ions in the 3+ valence state, which is in the same state as that of host Y ions.

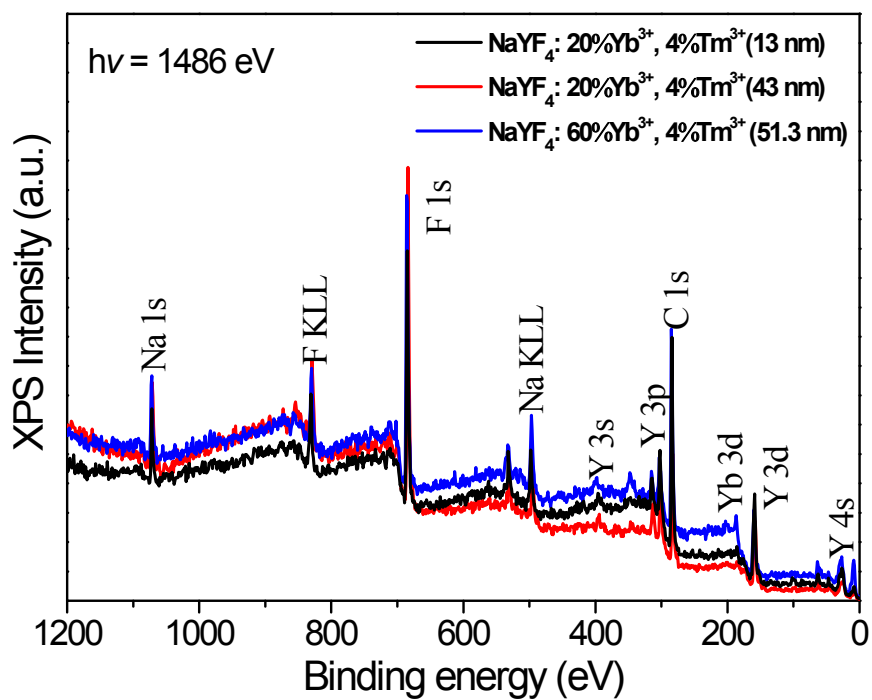

**Figure S2.** XPS survey spectra for the NaYF<sub>4</sub> UCNP samples acquired at the photon energy of 1486 eV. All the peaks can be identified to the elements in the UCNP.

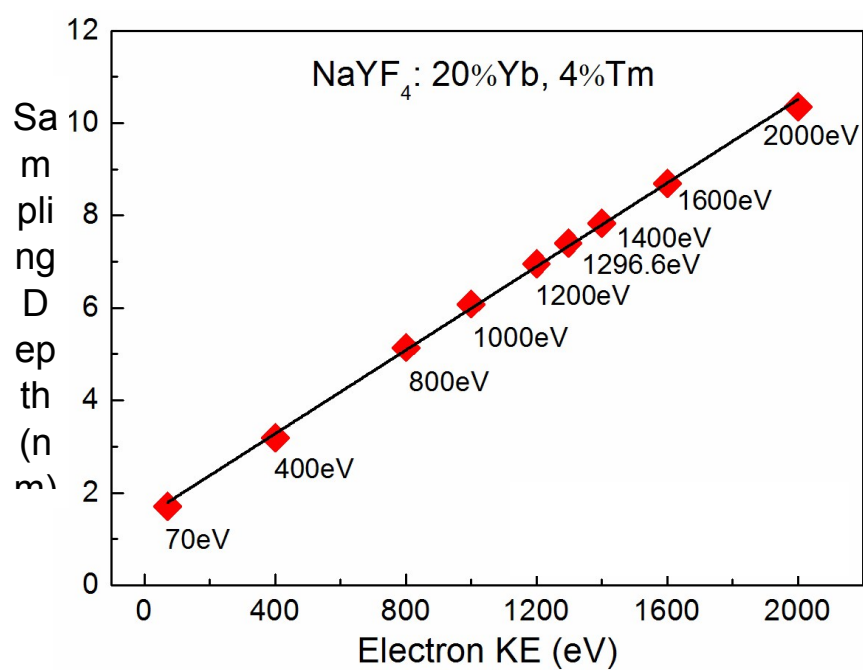

**Figure S3.** XPS sampling depth in NaYF<sub>4</sub> as a function of photoelectron kinetic energy (KE).

Table S1: Elemental composition of NaYF<sub>4</sub> UCNPs doped with Yb and Tm obtained from ICP-MS analysis.

| Size | Designed Composition |                  |                  | Measured Composition |                  |                  |
|------|----------------------|------------------|------------------|----------------------|------------------|------------------|
| (nm) | Y <sup>3+</sup>      | Yb <sup>3+</sup> | Tm <sup>3+</sup> | Y <sup>3+</sup>      | Yb <sup>3+</sup> | Tm <sup>3+</sup> |
| 13.0 | 76%                  | 20%              | 4%               | 76.03%               | 20.21%           | 3.75%            |
| 26.2 |                      |                  |                  | 75.52%               | 20.94%           | 3.30%            |
| 31.1 |                      |                  |                  | 77.87%               | 18.23%           | 3.54%            |
| 36.6 |                      |                  |                  | 78.88%               | 17.42%           | 3.90%            |
| 43.0 |                      |                  |                  | 79.62%               | 17.05%           | 3.70%            |
| 27.4 | 66%                  | 30%              |                  | 68.89%               | 27.60%           | 3.51%            |
| 35.9 | 51%                  | 45%              |                  | 53.05%               | 43.22%           | 3.74%            |
| 51.3 | 36%                  | 60%              |                  | 33.48%               | 63.24%           | 3.28%            |
